# Supplementary material for: Assessment of extreme flows and uncertainty under climate change: disentangling the contribution of RCPs, GCMs and internal climate variability
Source: Copernicus journal article supplement (doi:10.5194/hess-2020-25), 2020-02-14
Supplement: Supplementary file 1 [file hess-2020-25-supplement.pdf]

# Supplement

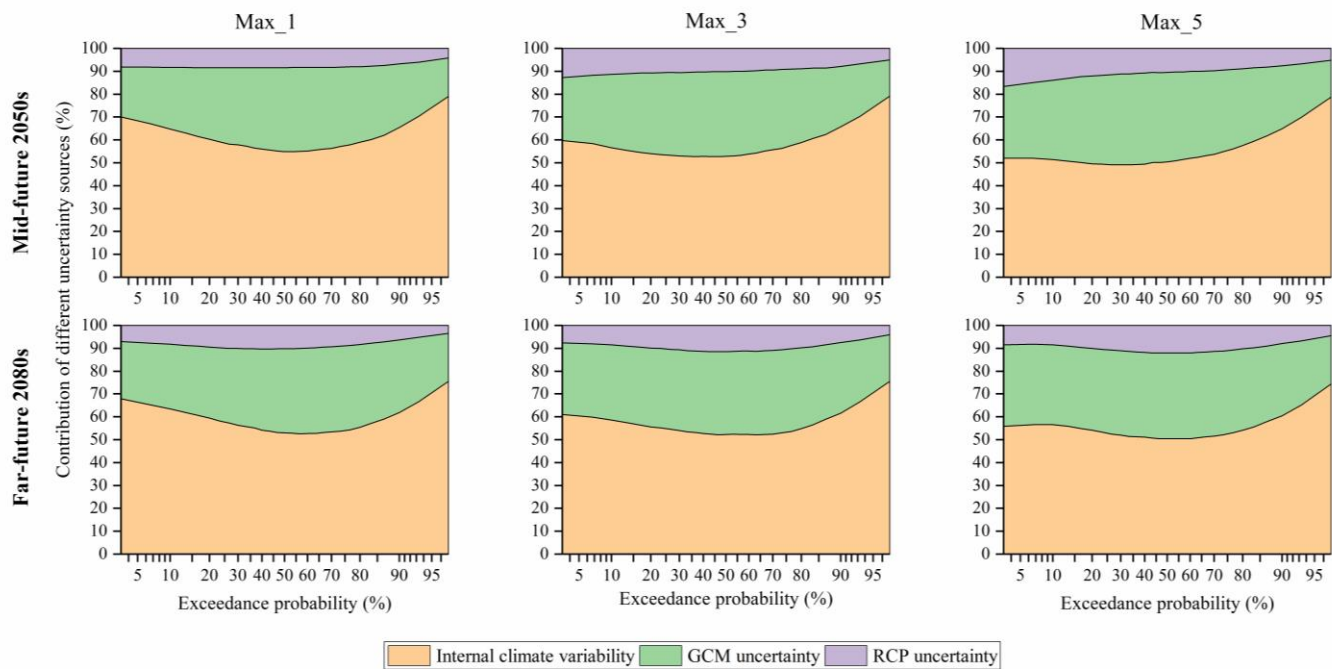

5 **Figure S1:** Contribution of three uncertainty sources, i.e. from RCPs, GCMs and internal climate variability for extreme rainfall in the mid-future period 2050s and the far-future period 2080s, respectively. Symbols Max\_1, Max\_3 and Max\_5 represent the annual maximum 1-, 3- and 5-day rainfall, respectively.

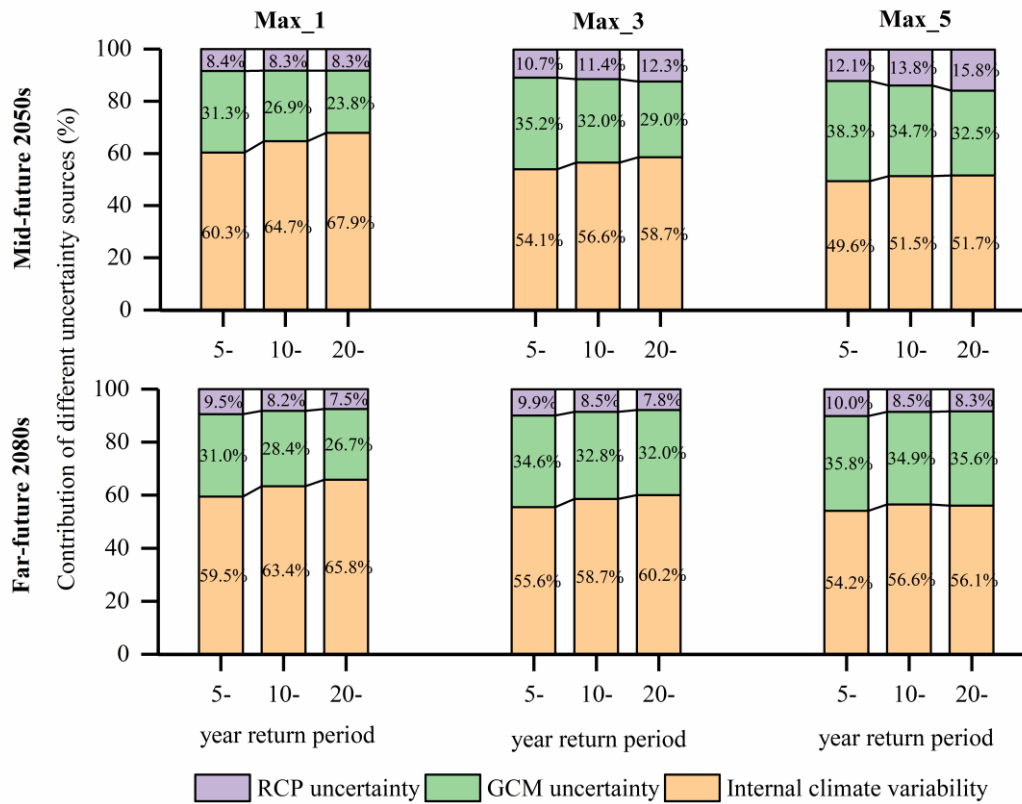

**Figure S2:** Contribution of the three uncertainty sources for extreme rainfall at 5-, 10- and 20-year return periods in the mid-future period 2050s and the far-future period 2080s, respectively. Symbols Max\_1, Max\_3 and Max\_5 represent the annual maximum 1-, 3- and 5-day rainfall, respectively. The figures on the bars represent the contribution values of different uncertainty sources.

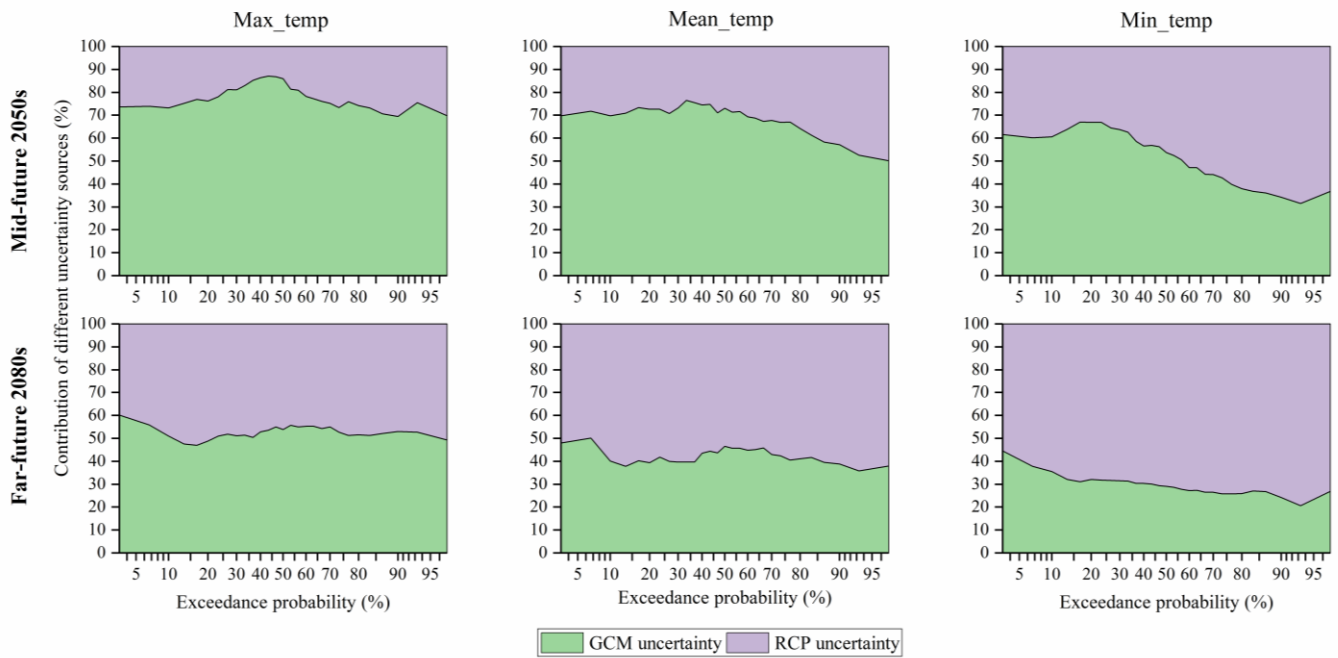

**Figure S3:** Contribution of RCP and GCM uncertainty sources for annual maximum daily maximum, minimum and mean temperatures in the mid-future period 2050s and the far-future period 2080s, respectively. Symbols Max\_temp, Min\_temp and Mean\_temp represent the

15 daily maximum, minimum and mean temperatures, respectively.

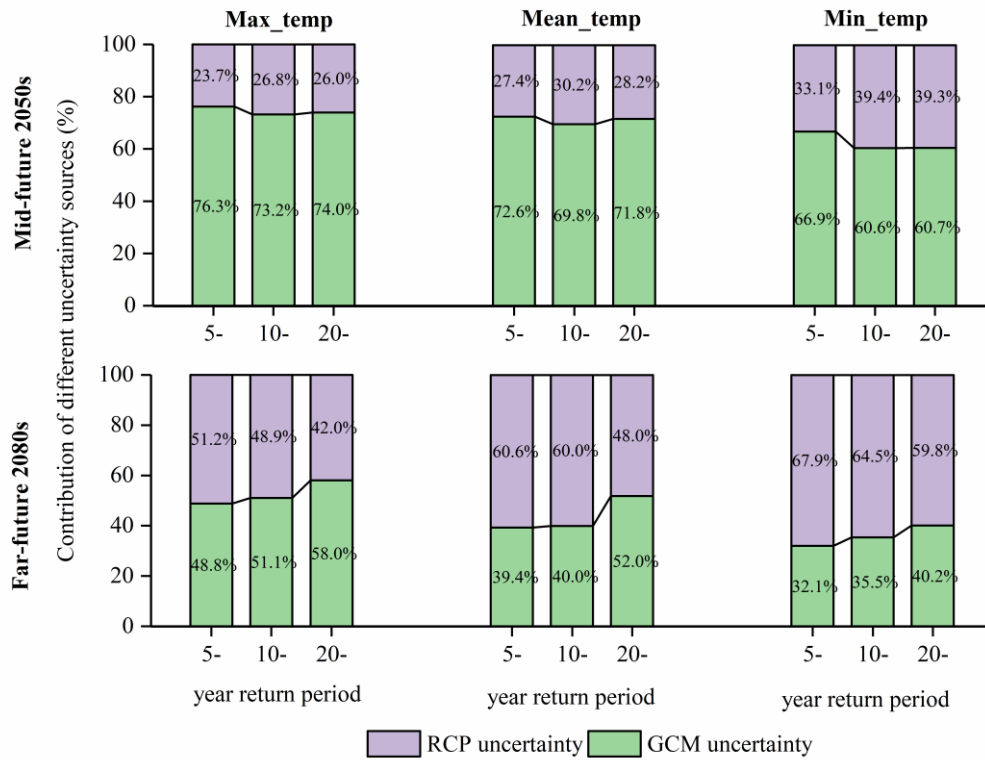

**Figure S4:** Contribution of RCP and GCM uncertainty sources for annual maximum daily maximum, minimum and mean temperatures at 5-, 10- and 20- return periods in the mid-future period 2050s and the far-future period 2080s, respectively. Symbols Max\_temp, Min\_temp and Mean\_temp represent the daily maximum, minimum and mean temperatures, respectively. The figures on the bars represent the contribution values of different uncertainty sources.
